# Supplementary material
Source: PubMed Central journal article supplement (PMC3048730)

## Supplemental Fig. 1

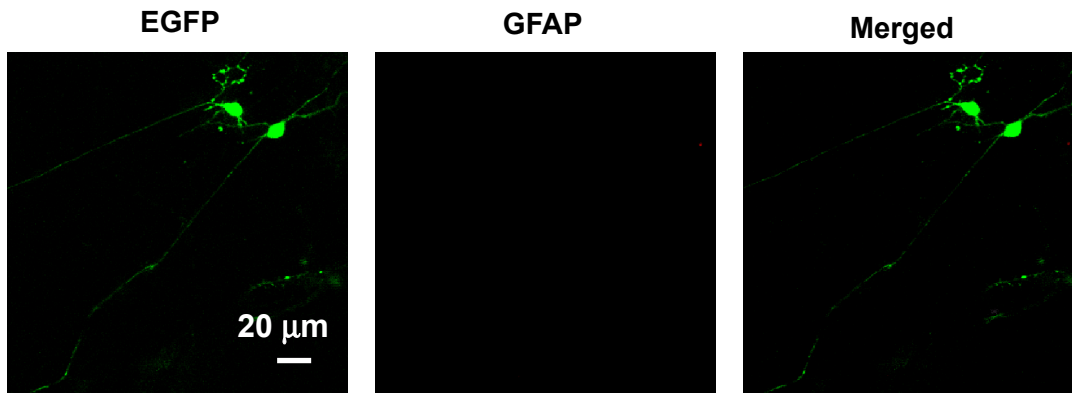

## Supplemental Fig. 2

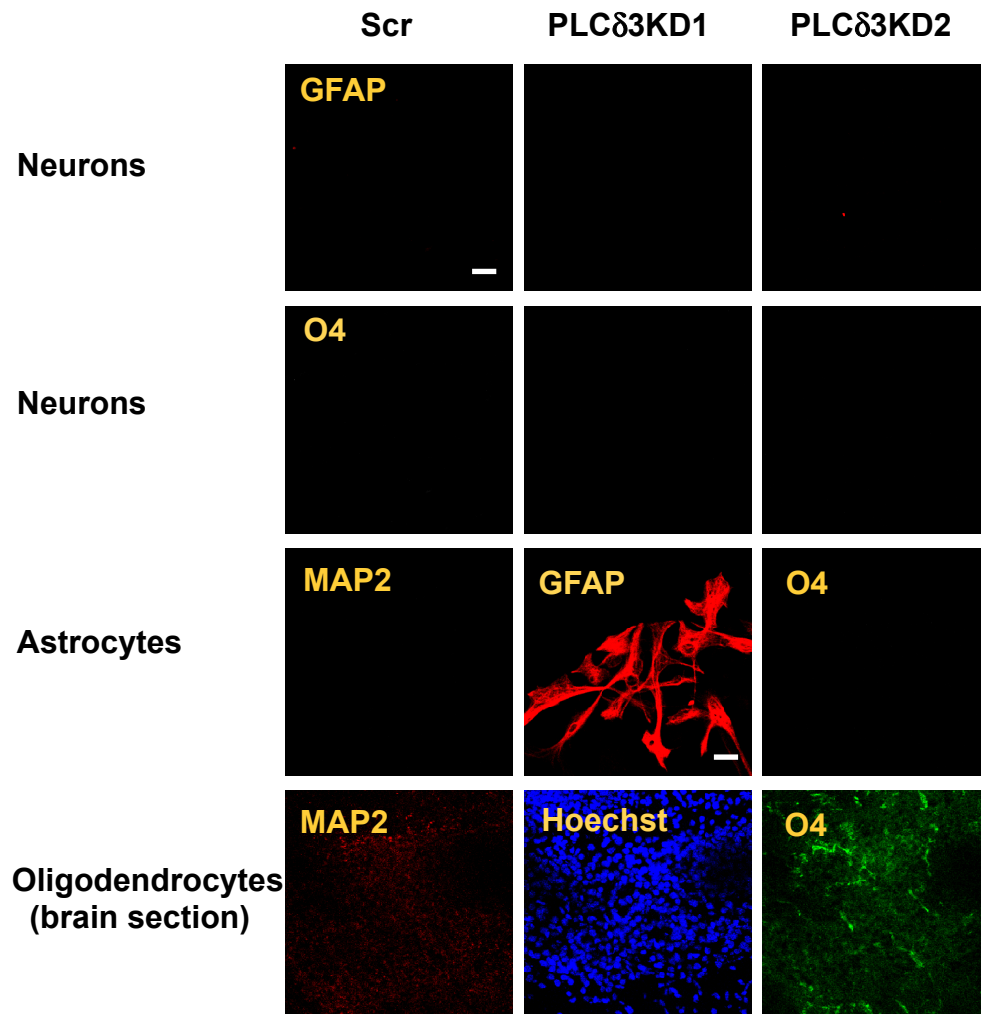

# Supplemental Fig. 3

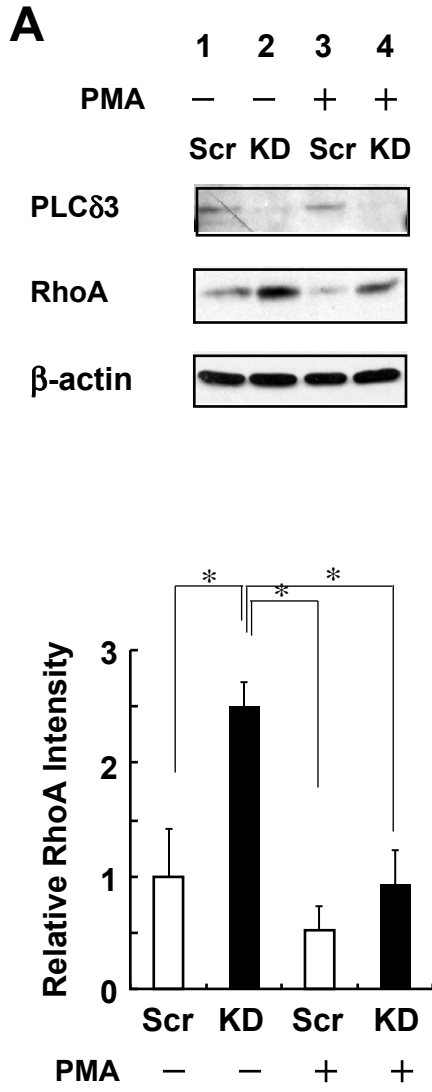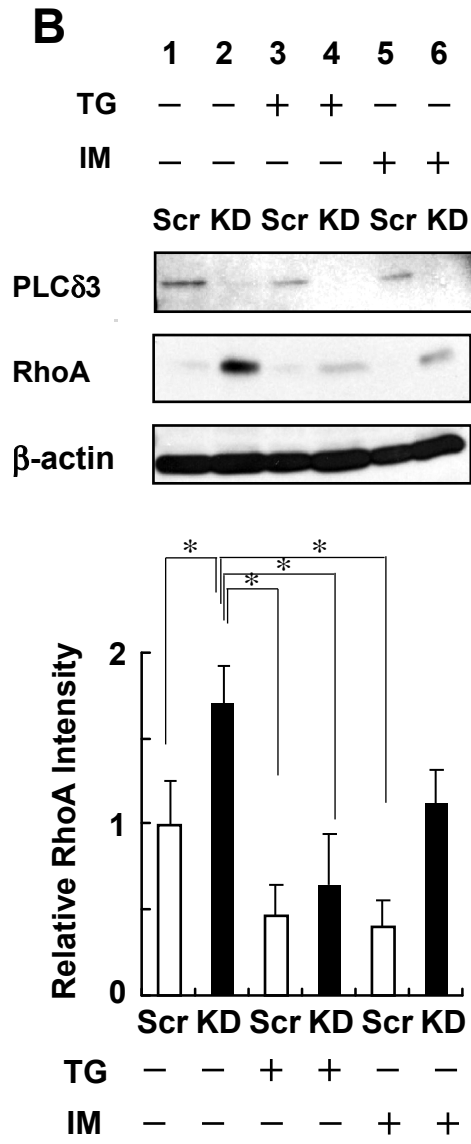

Supplement: supp_M110.171223_jbc.M110.171223-1.pdf [file supp_M110.171223_jbc.M110.171223-1.pdf]
